# Supplementary material
Source: Springer Nature journal article supplement (https://www.springermedizin.de/resource/supplementary/12936_2005_143_MOESM1_ESM.pdf/9546974)

**A**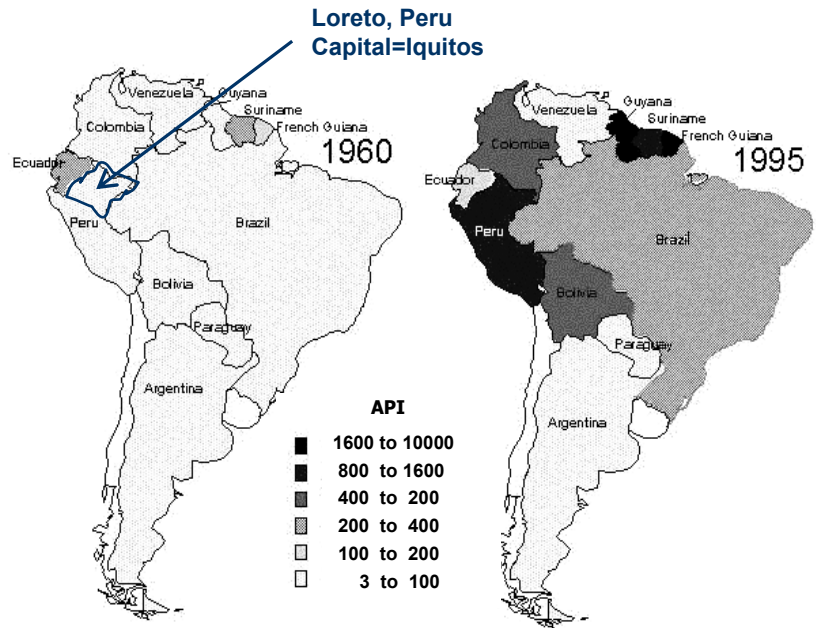**B**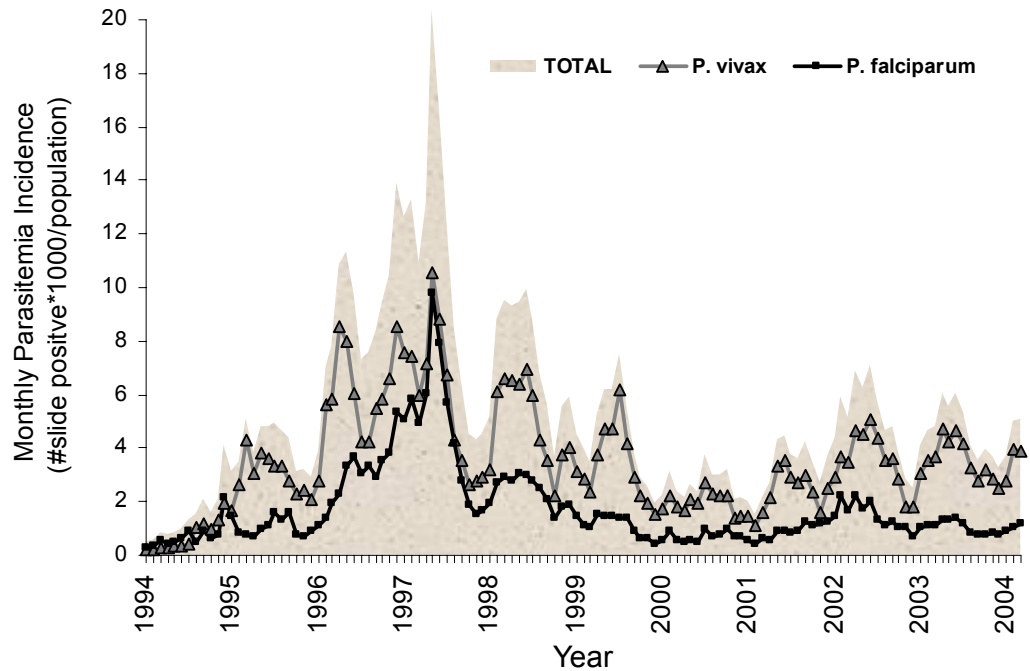

Supplement: MOESM1 [file 9546974]
